# Supplementary material
Source: publisher site journal article supplement (https://www.dovepress.com/article/282189)
Supplement: Supplementary file 1 [file get_supplementary_file.php]

Supplementary tables and figures

**Fig S1. Gating**

**Figure S1. Flow cytometry quantification of CD4+ T cells in the PMBC following the gating strategy.**

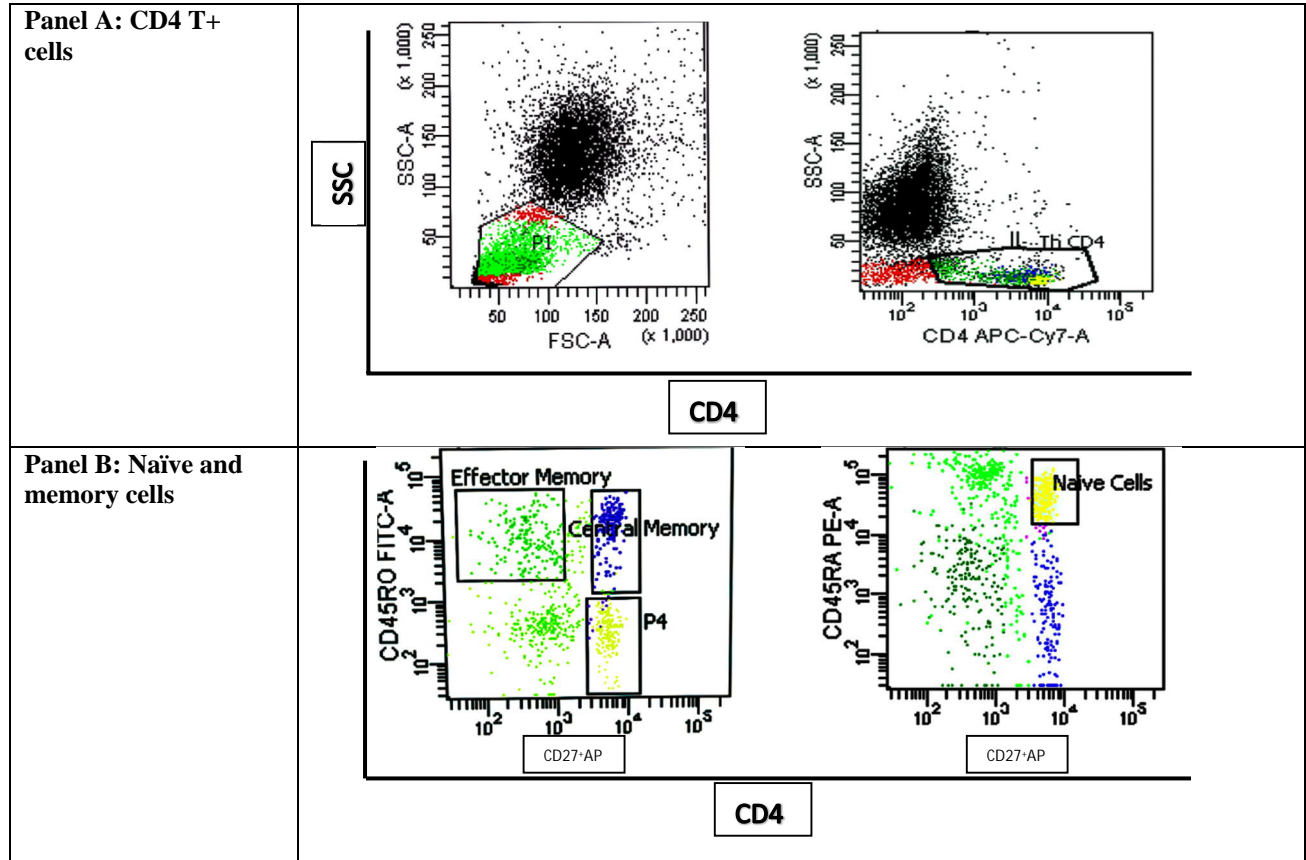

**Fig S1** displays the gating of CD4+ T cells from PBMC.

**Panel A**, CD4+ cells were first gated for T- cells CD4+. **Panel B**, CD4+ cells, are followed by gating of the intersection of both cell populations for CD45RO+ and CD27+ for central memory “CM” cells and CD45RO+ and CD27- for effector memory “EM” cells and CD45RA+ and CD27+ for naive cells.

FigS2. Gating of T reg cells with unstained and stained Foxp3/ isotype control

A

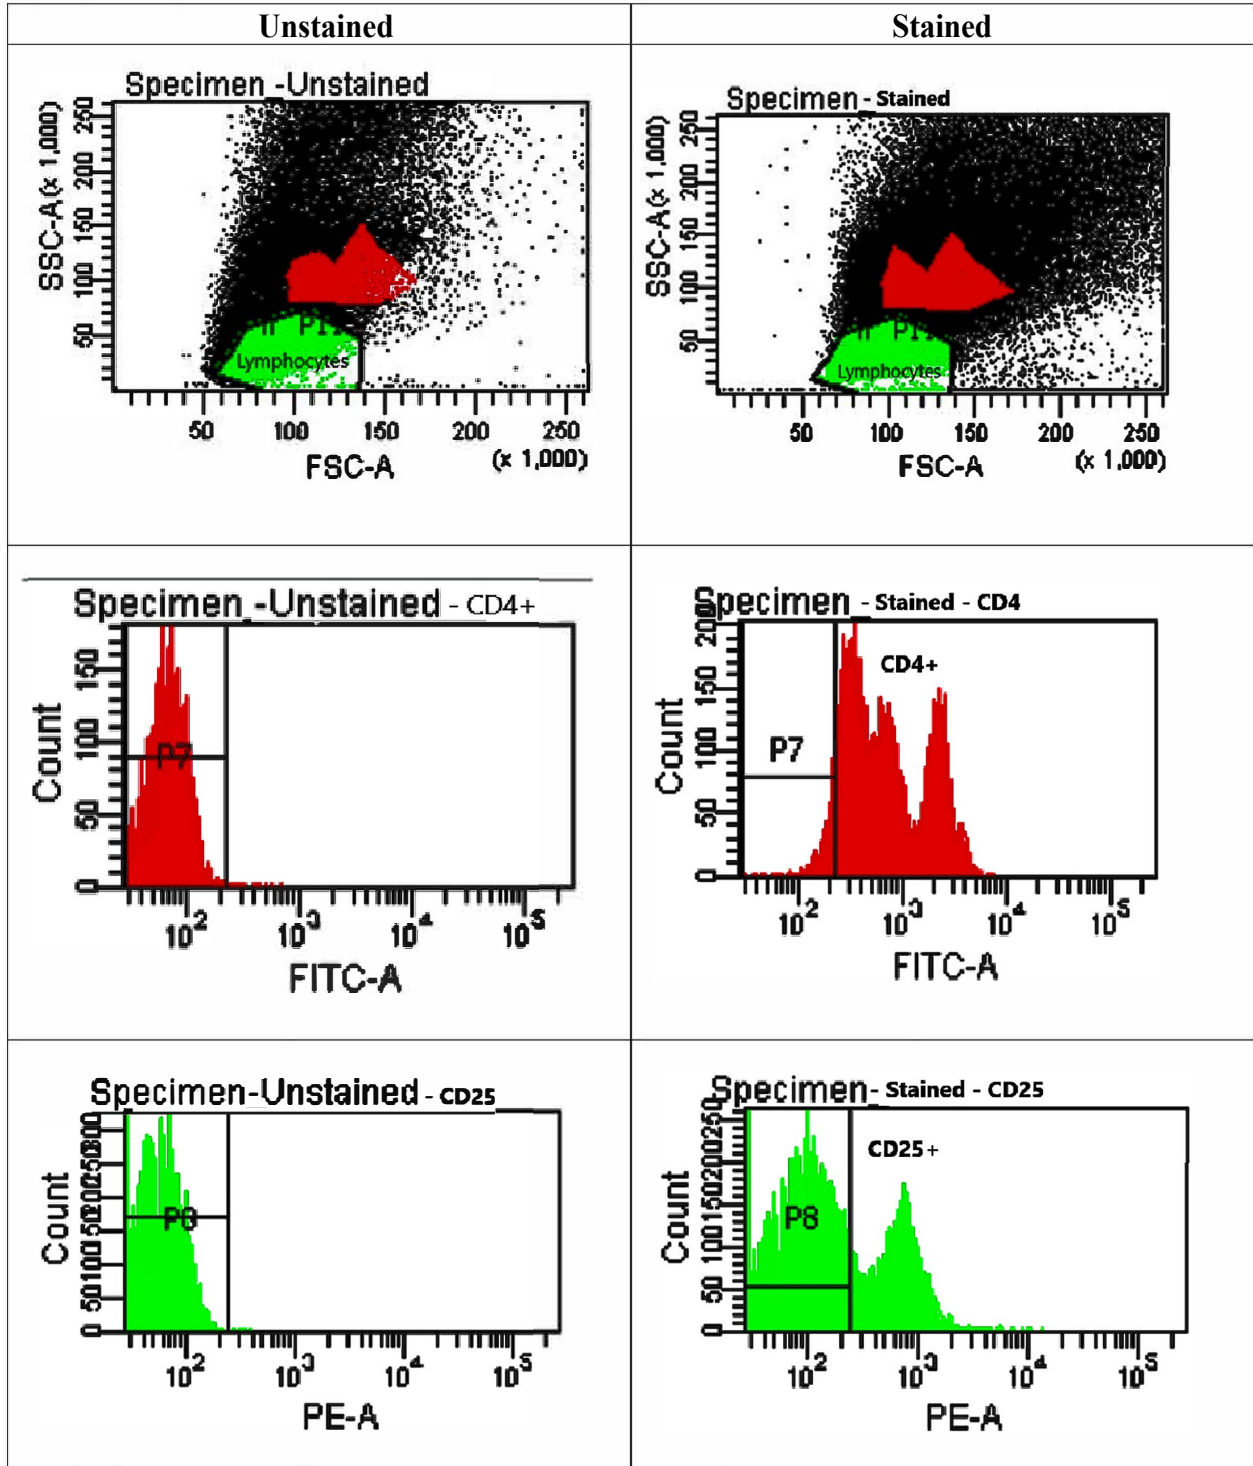

B

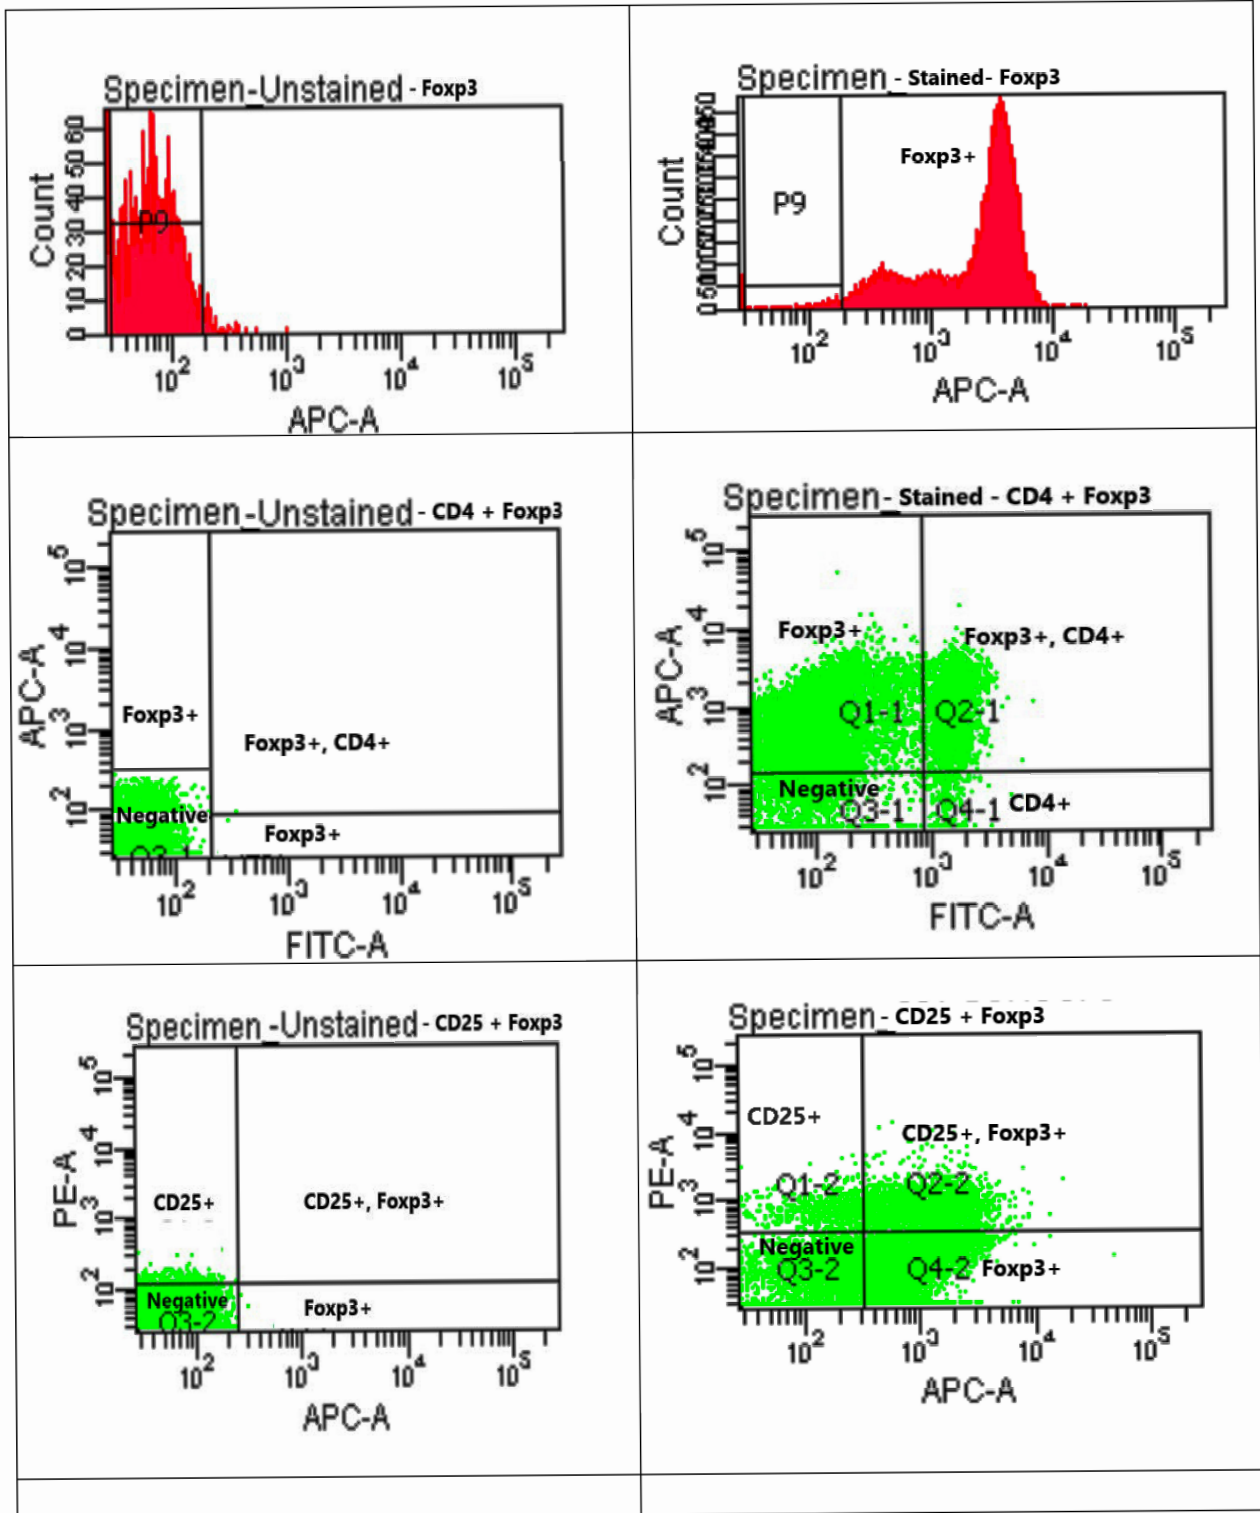

C

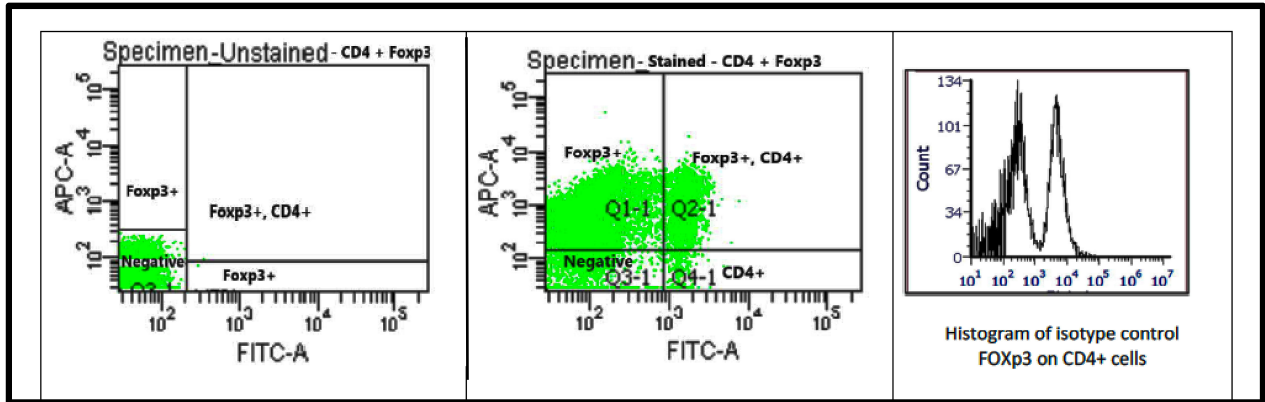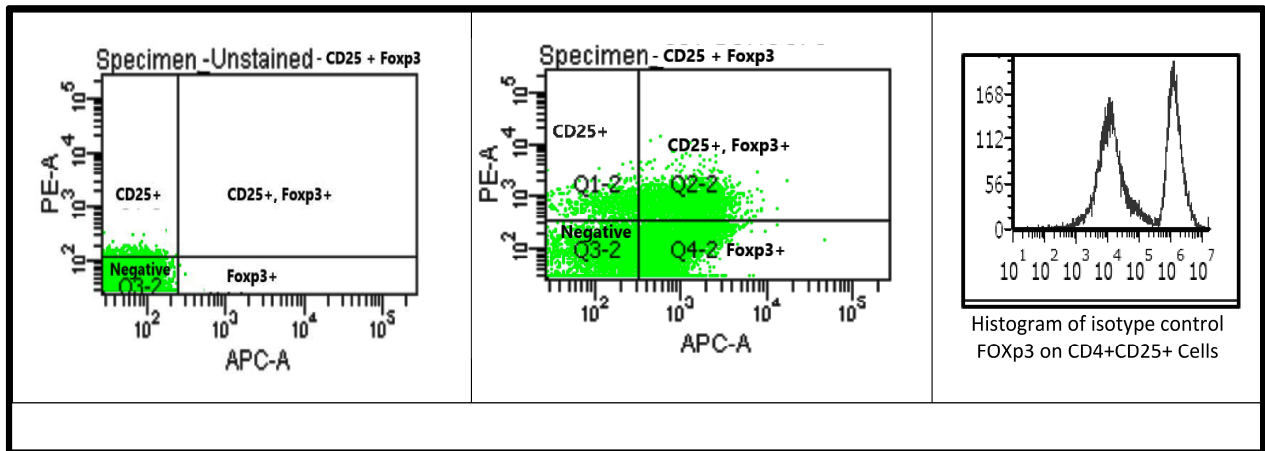

Fig S2. Displays the gating of CD4+De25+FoxP3+ T cells of unstained/ stained with histogram depicting isotype control for FoxP3 (A-C).

**Fig S3. Flow cytometry gating for VAT macrophages (CD206 and CD11b)**

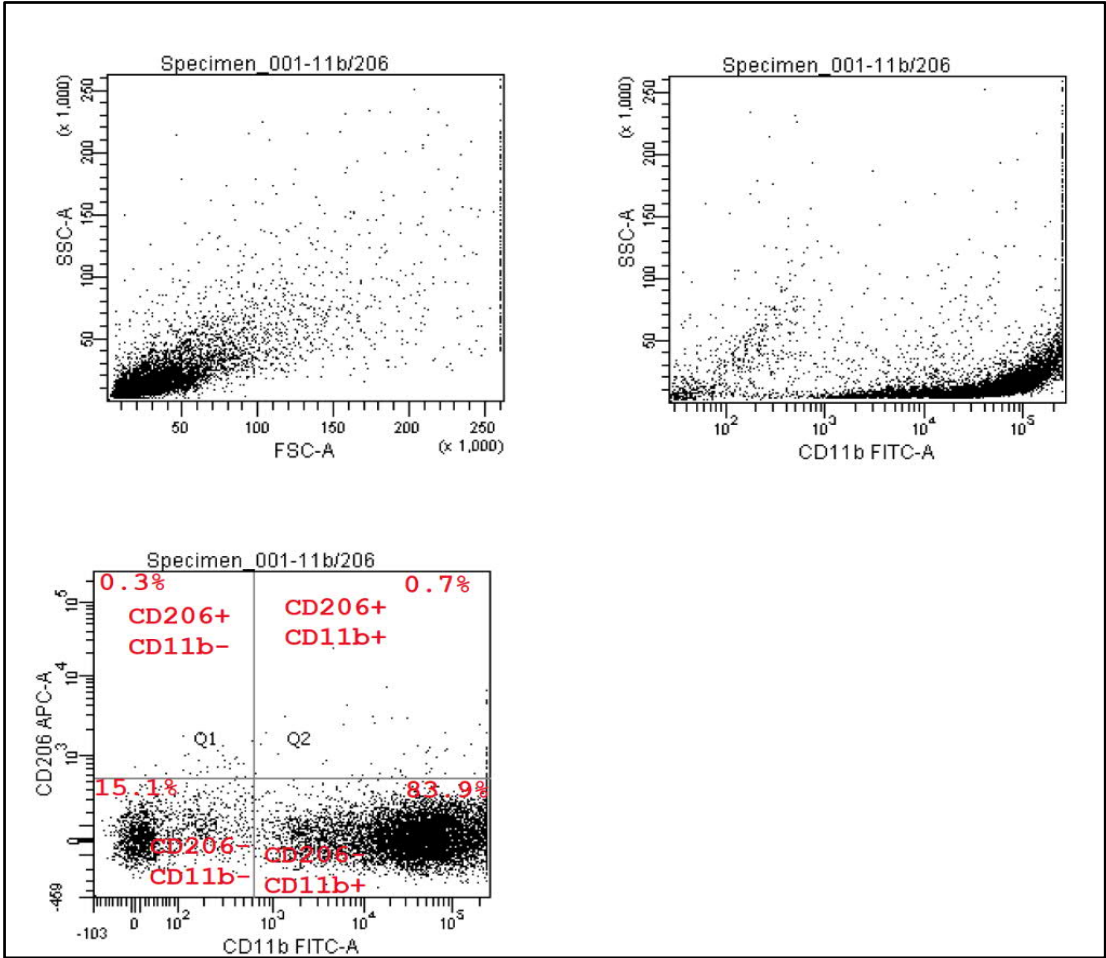

**Fig S3** displays the gating of CD206+/CD11b+ macrophage cells from visceral adipose tissue.

**Fig S4.** Comparison of T reg cells in healthy control subjects versus obese subjects after and before surgery

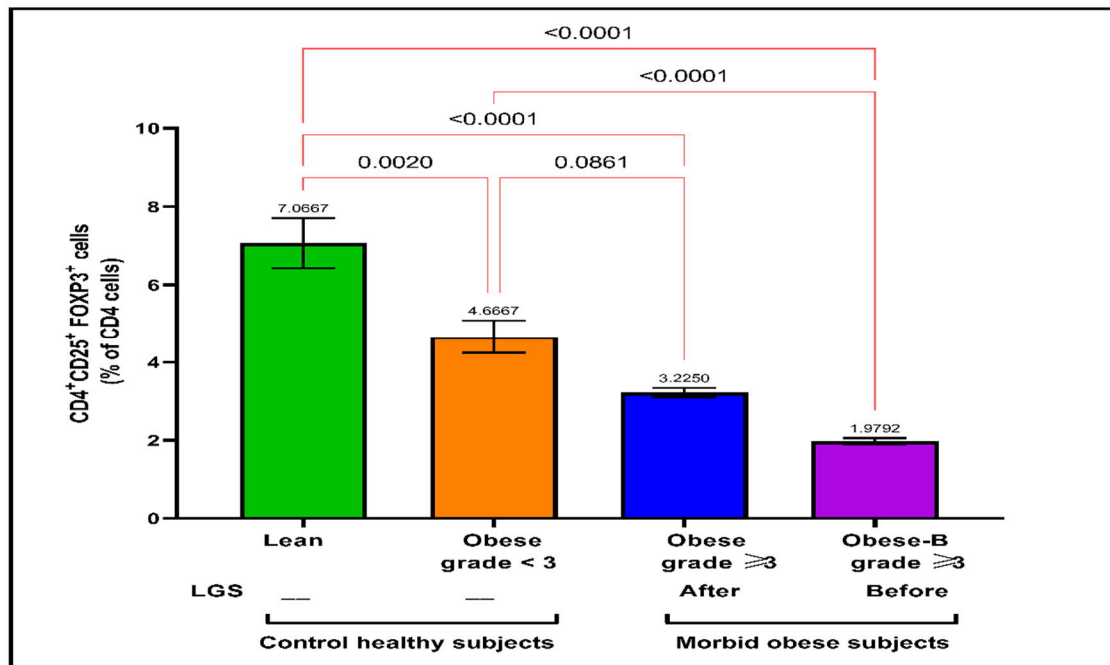

Bars represent mean and SD of T Reg cells in healthy subjects (lean, obese with grade less than 3), and obese with grade 3 or above before (B) and after (A) LGS. Two-tailed p value is significant at  $\leq 0.05$ .

**Fig S5.** Naive and TEM cells in diabetic and non-diabetic obese subjects before and after LGS.

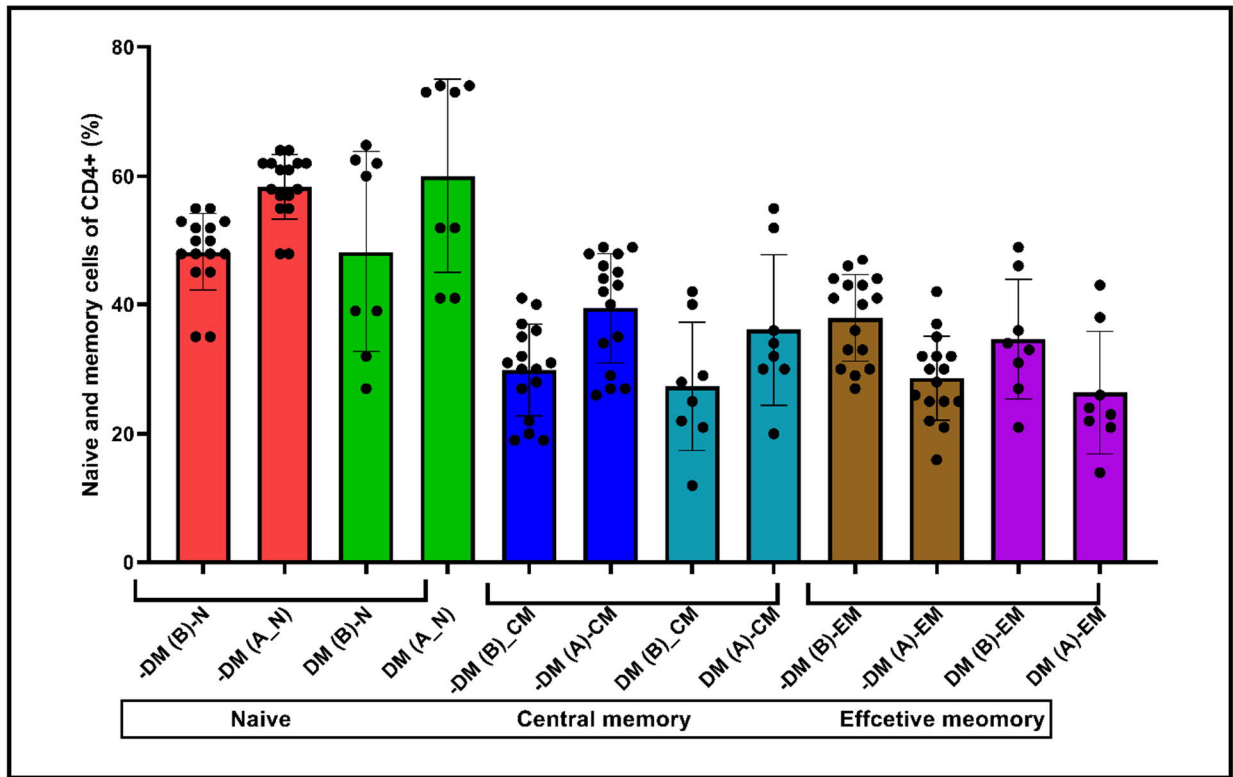

**Fig S5.** Figure displays the mean and SD of Naive and TEM cells in healthy subjects (lean, obese with grade less than 3), and obese with grade 3 or above before (B) and after (A) LGS. Two-tailed p value is significant at  $\leq 0.05$ .

**Figure S6.** Impact of DM on Treg cells at baseline and after LGS in Class 111 obese subjects.

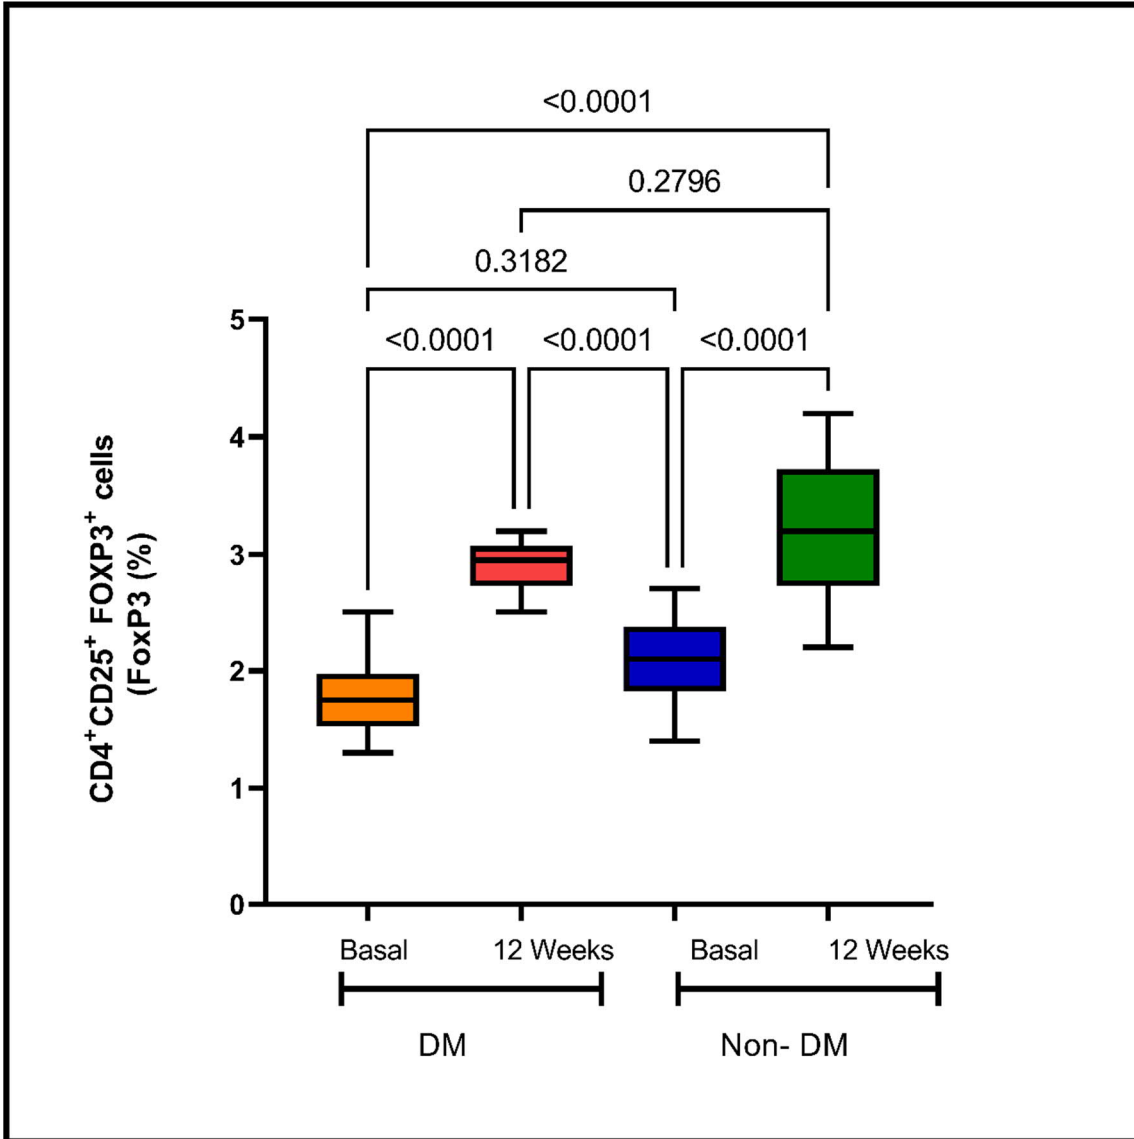

**Fig S6.** Bars represent mean with minimum and maximum of T reg cells in diabetic and non-diabetic obese subjects at basal (before) and after after 12 weeks of LGS surgery. P values in numbers were indicated between different group comparison. Two-tailed p value is significant at  $\leq 0.05$ .



**Figure S 7.** Impact of Insulin Resistance on Treg cells at baseline and after LGS in Class 111 obese subjects.

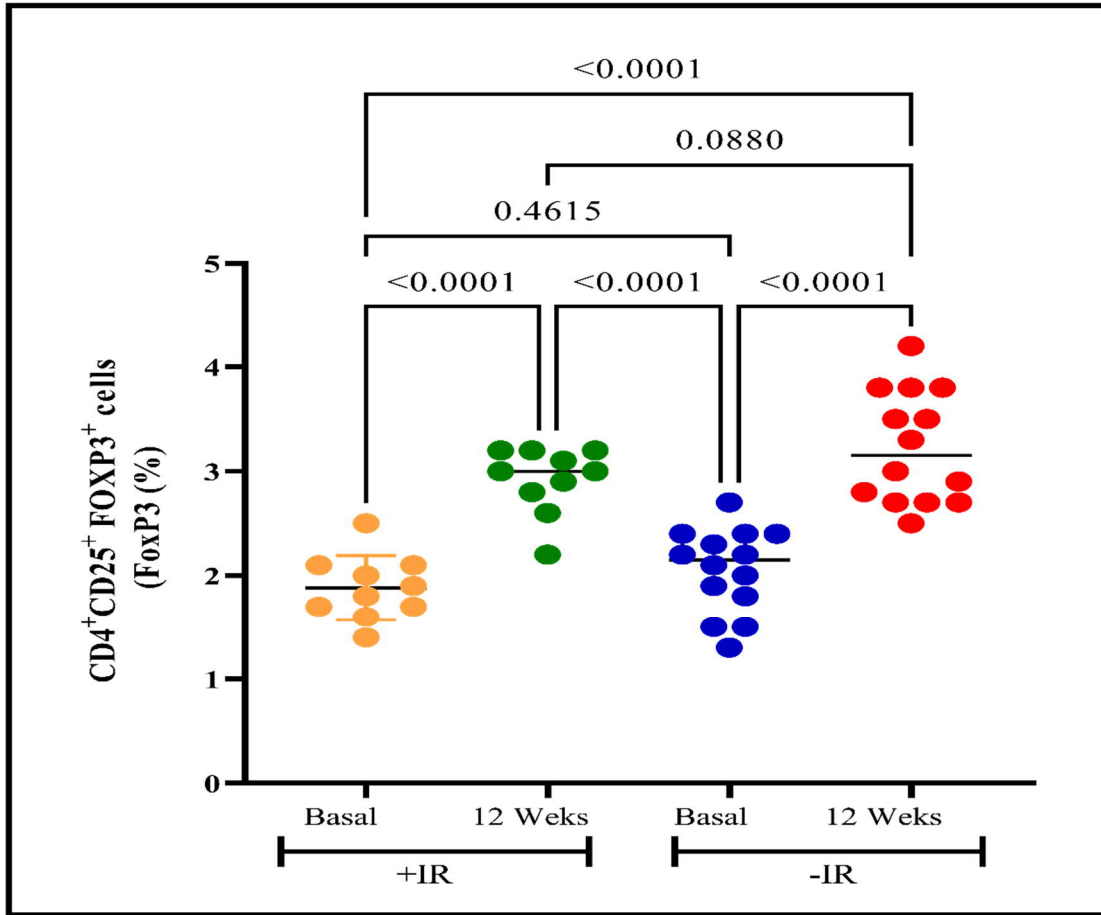

Scatter dot Plot represent means and SD of T reg cells (%) in Class 111 obese subjects before surgery (basal) and after LGS (12 weeks) with/without insulin resistance. P values in numbers were indicated between different group comparison. Two-tailed p value is significant at  $\leq 0.05$ .

**Figure S8.** Correlations between CRP and MCP-1 after LGS with TEM and Naive cells

A

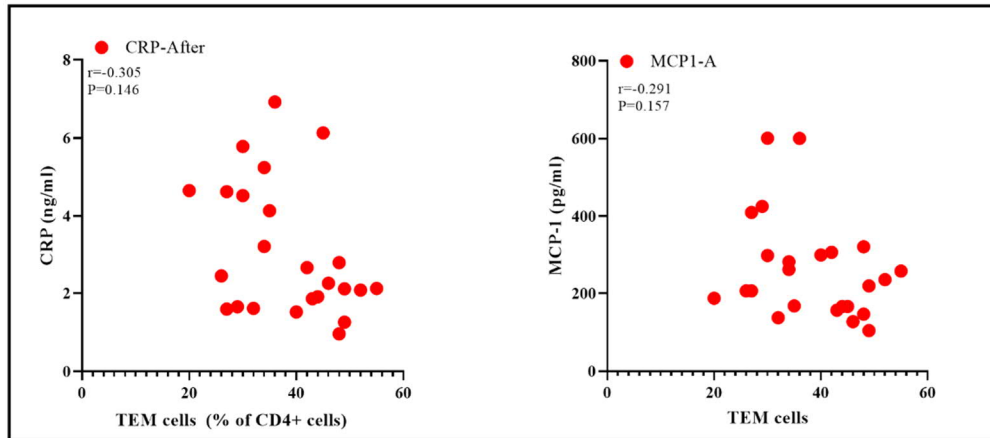

B

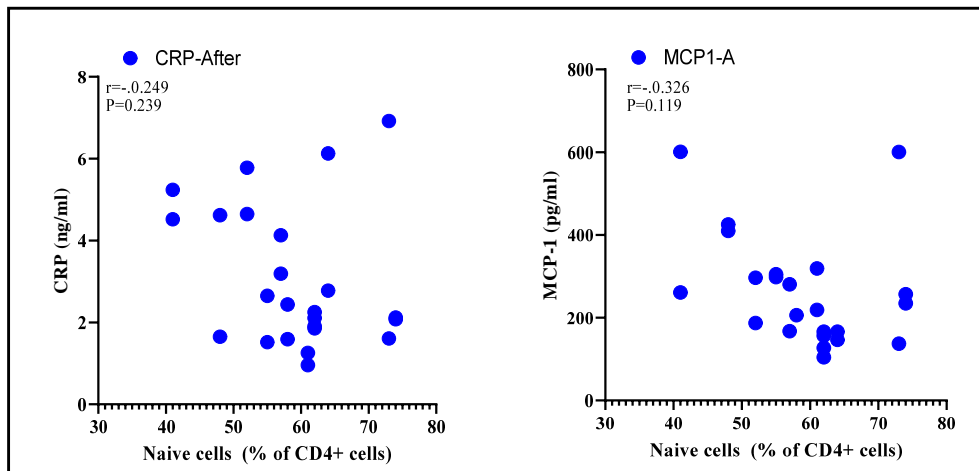

Figure S8. Spearman's Correlations ( $r$ ) between effector memory naïve(A) , and naïve CD4+ T cells(B) count in morbidly obese subjects with CRP, and MCP-1 after LGS .*Two tailed p* value is significant  $\leq 0.05$ .

### **Supplementary tables**

**Table S1** shows the CD4-T cell type and markers used for identification.

| CD4+ T cell                       | CD marker        |
|-----------------------------------|------------------|
| naïve CD4 T cells -1              | CD45RA+and CD27+ |
| central memory T cells            | CD45RO+and CD27+ |
| effector/peripheral memory        | CD45RO+and CD27- |
| terminally differentiated T cells | CD45RA+and CD27- |
| T regulatory cells                | CD4+CD25+FoxP3+  |

**Supplementary Table 2.** Fluorochrome-antibody combinations used for flow cytometry experiments.

| <b>Human</b>                           | <b>Fluorochrome</b> | <b>Clone</b> | <b>Company</b>                     |
|----------------------------------------|---------------------|--------------|------------------------------------|
| CD4                                    | APC-cy7             | SK3          | BD Biosciences (San Jose, CA, USA) |
| CD25                                   | APC                 | 2A3          | BD Biosciences (San Jose, CA, USA) |
| CD27                                   | APC                 | L128         | BD Biosciences (San Jose, CA, USA) |
| CD45RA                                 | PE                  | 5H9          | BD Biosciences (San Jose, CA, USA) |
| CD45RO                                 | FITC                | UCHL1        | BD Biosciences (San Jose, CA, USA) |
| FoxP3                                  | PE                  | PCH101       | E Bioscience (San Diego, CA, USA)  |
| CD206                                  | APC                 | 19.2         | BD Biosciences (San Jose, CA, USA) |
| CD11b                                  | FITC                | ICRF44       | BD Biosciences (San Jose, CA, USA) |
| CD3                                    | PerCP               | SK7          | Biosciences (San Jose, CA, USA)    |
| Mouse IgG1<br>kappa Isotype<br>Control | PE                  | P3.6.2.8.1   | E Bioscience (San Diego, CA, USA)  |

Table S3. Correlations coefficient (r )between Treg CD4+ (before and after LGS), CD4+T subpopulations, and metabolic, adipokines, and inflammatory and cytokines at baseline.

| <b>Variable</b>     | <b><u>Treg -B</u></b> | <b>Naïve CD4</b> | <b>TEM CD4</b> | <b>CM CD4</b> | <b><u>Treg -A</u></b> |
|---------------------|-----------------------|------------------|----------------|---------------|-----------------------|
| BMI                 | 0.217                 | 0.133            | -0.032         | -0.053        | 0.196                 |
| T. Cholesterol      | -0.129                | -0.367           | -0.103         | -0.171        | 0.102                 |
| Triglycerides       | 0.022                 | 0.342            | -0.054         | -0.081        | 0.146                 |
| HbA1C               | -0.175                | -0.155           | -0.257         | -0.165        | -0.224                |
| IR-HOMA             | -0.154                | -0.242           | -0.397         | -0.338        | -0.015                |
| Insulin sensitivity | 0.152                 | 0.075            | 0.152          | 0.197         | 0.146                 |
| CRP                 | 0.091                 | -0.256           | -0.261*        | -0.133        | 0.143                 |
| IL-10               | 0.262                 | 0.307*           | 0.199          | 0.241         | -0.065                |
| Leptin              | -0.458*               | 0.278            | 0.291          | 0.269         | -0.137                |
| Adiponectin         | 0.256                 | -0.157           | 0.027          | -0.012        | 0.225                 |
| IL-6                | -0.013                | 0.312            | 0.283          | 0.209         | 0.088                 |
| TNF- $\alpha$       | -0.266                | 0.052            | 0.046          | 0.064         | 0.130                 |
| MCP-1               | 0.191                 | -0.128           | -0.195*        | -0.217        | 0.225                 |

Spearman's correlation coefficient [r] is presented. \* P value is significant with a cut off value of  $\leq 0.05$  (two-tailed).

**Table S4** impact of diabetes on CD4+ subpopulations(A) , inflammatory, cytokine, chemokine and adipokine markers (B) at baseline and after 12 weeks of LGS.

A- Impact on CD4+ subpopulations

| Variables (%) | Basal state (24) | 3 months (24)  |
|---------------|------------------|----------------|
|               | Before LGS       | After LGS      |
| <hr/>         |                  |                |
| Treg          |                  |                |
| DM (-)        | 2.08 (0.34)      | 3.200 (0.54)   |
| DM(+)         | 1.79 (0.36)      | 2.90 (0.22)    |
| P value       | 0.318            | 0.279          |
| <hr/>         |                  |                |
| Naive         |                  |                |
| DM (-)        | 48.35( 6.017)    | 58.38( 4.978)  |
| DM(+)         | 48.29 (15.54)    | 59.00 ( 15.02) |
| P value       | 0.990            | 0.997          |
| <hr/>         |                  |                |
| CM            |                  |                |
| DM (-)        | 29.88 (7.09)     | 39.50 (8.53)   |
| DM(+)         | 27.38 (9.91)     | 36.13( 11.74)  |
| P value       | 0.915            | 0.818          |
| <hr/>         |                  |                |
| EM            |                  |                |
| DM (-)        | 37.94(6.70)      | 28.63(6.51)    |
| DM(+)         | 34.63(9.24)      | 26.38(9.49)    |
| P value       | 0.745            | 0.902          |
| <hr/>         |                  |                |

Data are presented of CD4+ subpopulations count expressed in percentage of total CD4+ cells.

P value is significant between before with (DM+) and without diabetes (DM-) and after LGS with (DM+) and without diabetes(DM-). Two-tailed *p* value is significant at  $\leq 0.05$ .

B- Impact on inflammatory, cytokine, chemokine and adipokine markers at baseline and after 12 weeks of LGS.

| Variables          | Basal state (24) | 3 months (24)  |
|--------------------|------------------|----------------|
|                    | Before LGS       | After LGS      |
| <b>CRP</b>         |                  |                |
| DM (-)             | 3.82 (0.50)      | 2.56 (0.39)    |
| DM(+)              | 5.96(0.71)       | 4.11 (0.55)    |
| P value            | 0.022            | 0.033          |
| <b>IL-6</b>        |                  |                |
| DM (-)             | 1.61(0.68)       | 1.27(0.48)     |
| DM(+)              | 1.30 (1.09)      | 1.05 (0.63)    |
| P value            | 0.450            | 0.758          |
| <b>TNF-alpha</b>   |                  |                |
| DM (-)             | 3.54(1.47)       | 2.85(1.03)     |
| DM(+)              | 3.25(1.50)       | 2.70(1.49)     |
| P value            | 0.542            | 0.903          |
| <b>MCP-1</b>       |                  |                |
| DM (-)             | 249.38(87.77)    | 231.38(97.70)  |
| DM(+)              | 366.22(172.71)   | 321.89(175.86) |
| P value            | 0.098            | 0.270          |
| <b>IL-10</b>       |                  |                |
| DM (-)             | 0.62(0.31)       | 0.81(0.35)     |
| DM(+)              | 0.47(0.19)       | 0.61(0.23)     |
| P value            | 0.230            | 0.186          |
| <b>Leptin</b>      |                  |                |
| DM (-)             | 28.15(7.56)      | 17.50(5.92)    |
| DM(+)              | 28.87 (6.30)     | 18.66(6.40)    |
| P value            | 0.970            | 0.452          |
| <b>Adiponectin</b> |                  |                |
| DM (-)             | 6.07(1.24)       | 11.54(2.77)    |
| DM(+)              | 5.32(2.35)       | 10.76(2.64)    |
| P value            | 0.782            | 0.759          |

Data are presented as mean (SD). P value is significant between before with (DM+) and without diabetes (DM-) and after LGS with (DM+) and without diabetes(DM-). Two-tailed *p* value is significant at  $\leq 0.05$ .

Two-tailed *p* value is significant at  $\leq 0.05$ .
